# Supplementary material for: Synthesis of the bis-spiroacetal moiety of the shellfish toxins spirolides B and D using an iterative oxidative radical cyclization strategy
Source: Royal Society of Chemistry journal article supplement (doi:10.1039/b604334h), 2006-01-01
Supplement: b604334h.pdf [file b604334h.pdf]

## ELECTRONIC SUPPLEMENTARY MATERIAL

### Synthesis of the bis-spiroacetal moiety of the shellfish toxins spiroalides B and D using an iterative radical oxidative cyclization strategy

Kai Meilert and Margaret A. Brimble\*

*Department of Chemistry, University of Auckland, 23 Symonds St., Auckland, New Zealand.*

FAX: +64 9 3737422; EMAIL: m.brimble@auckland.ac.nz

## Experimental

### General

All reactions were carried out under an N<sub>2</sub> atmosphere using oven-dried glassware using standard syringe and septum techniques, unless otherwise stated. Diethyl ether and tetrahydrofuran were distilled from Na/benzophenone under N<sub>2</sub>. Hexane, toluene, cyclohexane, CH<sub>2</sub>Cl<sub>2</sub>, and NEt<sub>3</sub> were distilled from CaH<sub>2</sub> under N<sub>2</sub>. Butyllithium (1.6 M in hexane) was purchased from the Aldrich Chemical Co. Flash chromatography was performed using Riedel-de Hën or Merck 0.032-0.063 mm silica gel and preparative layer chromatography with Merck silica gel 60 PF on glass plates, with the indicated solvents. Analytical TLC was performed with 0.20mm silica gel 60 aluminium-backed plates and analyzed using 365 nm ultraviolet irradiation followed by staining with either alkaline permanganate or vanillin/sulphuric acid solution. High resolution mass spectra were obtained using EI, CI and FAB techniques on a VG70-SE spectrometer. NMR spectra were recorded on either a Bruker DRX300 spectrometer operating at 300 MHz for <sup>1</sup>H nuclei and 75 MHz for <sup>13</sup>C nuclei or on a Bruker DRX400 spectrometer operating at 400 MHz for <sup>1</sup>H nuclei and 100 MHz for <sup>13</sup>C nuclei. <sup>1</sup>H NMR data is reported as chemical shift in δ ppm from tetramethylsilane as an internal standard, multiplicity (s = singlet, d = doublet, t = triplet, q = quartet, m = multiplet or overlap of non-equivalent resonances, br = broadening), integration and assignment. <sup>13</sup>C NMR data is reported as follows: chemical shift in ppm from tetramethylsilane with the solvent as an internal indicator (CDCl<sub>3</sub> 77.0 ppm), multiplicity with respect to proton (deduced from DEPT experiments). Melting points were determined on a Kofler hot-stage apparatus and are uncorrected. Optical rotations were determined on a Perkin-Elmer 341 polarimeter.

### (2S)-2-Benzyloxymethyloxirane **12**

To a mixture of (*R*)-(+)-glycidol (1.8 mL, 27.0 mmol) and benzyl bromide (6.4 mL, 54.0 mmol) at 0 °C was added tetrabutylammonium iodide (997 mg, 2.7 mmol). After stirring for 10 min NaH (713 mg, 29.7 mmol, 1.1 eq.) was added portion-wise. After 3 hours flash silica (20 g) was added and the solution filtered over through a Celite® pad and evaporated until dryness. Flash chromatography using hexane-ethyl acetate (95:5) as eluent afforded the title compound (3.20 g, 72%) as a colorless liquid for which the spectroscopic data agreed with the literature;<sup>i</sup>

$[\alpha]_{589}^{20}$  -3.0 (*c* = 0.37, CHCl<sub>3</sub>);  $\nu_{\max}$  (film)/cm<sup>-1</sup> 3060, 3030, 2860, 1495, 1455, 1385, 1335, 1255, 1206, 1095, 1025, 910, 860, 740, 700;  $\delta_{\text{H}}$  (400 MHz; CDCl<sub>3</sub>) 7.38–7.28 (m, 5H, ArH), 4.64 (d, 1H, *J* 11.8, CH<sub>2</sub>Ph), 4.59 (d, 1H, *J* 11.8, CH<sub>2</sub>Ph), 3.79 (dd, 1H, *J* 3.1 and 11.3, 1'-H<sub>a</sub>), 3.46 (dd, 1H, *J* 5.6 and 11.3, 1'-H<sub>b</sub>), 3.20 (dddd, 1H, *J* 2.8, 3.1, 4.1 and 5.6, 2-H), 2.81 (dd, 1H, *J* 4.1, *J* 5.1, 1-H<sub>a</sub>) and 2.63 (dd, 1H, *J* 2.8 and 5.1, 1-H<sub>b</sub>);  $\delta_{\text{C}}$  (100 MHz; CDCl<sub>3</sub>) 137.9 (C, C<sub>arom</sub>), 128.4 (2 x CH, C<sub>arom</sub>), 127.7 (3 x CH, C<sub>arom</sub>), 73.3 (CH<sub>2</sub>, CH<sub>2</sub>Ph), 70.8 (CH<sub>2</sub>, C-1'), 50.8 (CH, C-2), 44.3 and (CH<sub>2</sub>, C-1).

### (2S)-1-Benzyloxy-5-(trimethylsilyl)pent-4-yn-2-ol **13**

To a solution of trimethylsilyl acetylene (7.4 mL, 51.8 mmol) in dry toluene (150 mL) at 0 °C was added dropwise a solution of BuLi (1.6 M in hexane, 28.1 mL, 45.7 mmol). After stirring for 30 min the solution was cooled to -78 °C and epoxide **12** (5.0 g, 30.5 mmol) was added dropwise, followed by slow addition of Me<sub>3</sub>Al (1.5 mL, 3.0 mmol). The solution was allowed to warm to room temperature overnight then 10% HCl was added (150 mL). After extraction with Et<sub>2</sub>O (3 x 100 mL) and drying over MgSO<sub>4</sub> the solvent was removed at reduced pressure. Flash chromatography of the residue using using hexane-ethyl acetate (80:20) as eluent afforded the *title compound* (7.73 g, 98%) as a pale yellow liquid;  $[\alpha]_{589}^{20}$  +17.0 (*c* = 0.27, CHCl<sub>3</sub>);  $\nu_{\max}$  (film)/cm<sup>-1</sup> 3430, 2960, 2175, 1454, 1420, 1365, 1250, 1205, 1115, 1030, 945, 840, 760, 700, 650;  $\delta_{\text{H}}$  (400 MHz; CDCl<sub>3</sub>) 7.30-7.19 (m, 5H, ArH); 4.60 (s, 2H, CH<sub>2</sub>Ph); 3.87 (m, 1H, 2-H), 3.54 (dd, 1H, *J* 3.9 and 9.6, 1-H), 3.42 (dd, 1H, *J* 6.4 and 9.6, 1-H), 2.62 (d, 1H, *J* 4.6, 2-H), 2.44 (dd, 1H, *J* 4.6, 15.4, 3-H), 2.38 (dd, 1H, *J* 5.4 and 15.4, 3-H) and 0.08 (s, 9H, (CH<sub>3</sub>)<sub>3</sub>Si);  $\delta_{\text{C}}$  (100 MHz; CDCl<sub>3</sub>) 137.9 (C, C<sub>arom</sub>), 128.4 (2 x CH, C<sub>arom</sub>), 127.8 (CH, C<sub>arom</sub>), 127.7 (CH, C<sub>arom</sub>), 102.5 (C, C-5), 87.3 (C, C-4); 73.4 (CH<sub>2</sub>, C-1), 72.7 (CH<sub>2</sub>, CH<sub>2</sub>Ph), 68.8 (CH, C-2), 25.0 (CH<sub>2</sub>, C-3) and 0.10 (CH<sub>3</sub>, (CH<sub>3</sub>)<sub>3</sub>Si); MS (EI) *m/z* (%) 280 (100, [M + NH<sub>4</sub>]<sup>+</sup>), 263 (44, [M + H]<sup>+</sup>), 245 (5), 218 (11), 189 (19), 173 (59), 155 (8), 129 (8), 108 (28), 105 (25), 91 (98) and 70 (21); HRMS (CI) *m/z* 263.1465 (calcd for C<sub>15</sub>H<sub>23</sub>O<sub>2</sub>Si 263.1467).

**(2*S*,4*Z*)-1-(Benzyloxy)-5-(trimethylsilyl)pent-4-en-2-ol (*Z*)-14 and (2*S*,4*E*)-1-(Benzyloxy)-5-(trimethylsilyl)pent-4-en-2-ol (*E*)-14**

To a solution of 1-benzyloxy-5-(trimethylsilyl)pent-4-yn-2-ol **13** (2 g, 7.62 mmol) in dry Et<sub>2</sub>O (20 mL) at 0 °C was added drop-wise a solution of DIBALH (1 M in hexane, 22.9 mL, 22.9 mmol). The solution was allowed to warm to room temperature then heated under reflux for 24 hours. The cooled mixture was poured into a mixture of water-crushed ice 1:1 (30 mL) with vigorous stirring, followed by the addition of 1 M HCl (10 mL). After filtration through a Celite pad, the aqueous phase was extracted with Et<sub>2</sub>O (3 x 30 mL) and the organic extracts dried (MgSO<sub>4</sub>). Flash chromatography of the residue obtained after concentration of the solvent using hexane-ethyl acetate (95:5) as eluent afforded the title olefins (1.46 g, 72%) as a 92:8 *Z/E* mixture of diastereomers.

Spectroscopic data for (*Z*)-(**14**):

$[\alpha]_{589}^{20} +3$  (c = 0.16, CHCl<sub>3</sub>);  $\nu_{\max}$  (film)/cm<sup>-1</sup> 3435, 3030, 2950, 2860, 1605, 1495, 1455, 1410, 1365, 1250, 1095, 860, 830, 765, 740, 700, 605;  $\delta_{\text{H}}$  (400 MHz; CDCl<sub>3</sub>) 7.40-7.27 (m, 5H, ArH), 6.34 (td, 1H, *J* 7.3 and 14.4, 4-H), 5.66 (d, 1H, *J* 14.4, 5-H), 4.57 (s, 2H, CH<sub>2</sub>Ph), 3.90 (m, 1H, 2-H), 3.53 (dd, 1H, *J* 3.3 and 9.4, 1-H<sub>a</sub>), 3.39 (dd, 1H, *J* 7.5 and 9.4, 1-H<sub>b</sub>), 2.27-2.43 (m, 2H, 3-H), 0.15 (s, 9H, (CH<sub>3</sub>)<sub>3</sub>Si);  $\delta_{\text{C}}$  (100.6 MHz; CDCl<sub>3</sub>) 143.6 (CH, C-4), 137.8 (C, C<sub>arom</sub>), 132.1 (CH, C-5); 128.3 (3 x CH, C<sub>arom</sub>), 127.6 (2 x CH C<sub>arom</sub>), 74.6 (CH<sub>2</sub>, CH<sub>2</sub>Ph), 74.0 (CH<sub>2</sub>, CH<sub>2</sub>Ph), 70.1 (CH, C-2), 37.1 (CH<sub>2</sub>, C-3) and -1.73 (CH<sub>3</sub>, (CH<sub>3</sub>)<sub>3</sub>Si); MS (CI) *m/z* (%) 282 (93, [M + NH<sub>4</sub>]<sup>+</sup>), 265 (13, [M + H]<sup>+</sup>), 249 (4), 157 (28), 108 (82), 91 (100) and 73 (12); HRMS (CI): *m/z* 265.1626 (calcd for C<sub>15</sub>H<sub>25</sub>O<sub>2</sub>Si 265.1624).

Spectroscopic data for (*E*)-(**14**):

$\delta_{\text{H}}$  (400 MHz; CDCl<sub>3</sub>) 7.36-7.27 (m, 5H, ArH), 6.05 (td, 1H, *J* 6.7 and 18.5, 4-H), 5.70 (td, 1H, *J* 1.3 and 18.5, 5-H), 4.57 (s, 2H, CH<sub>2</sub>Ph), 3.90 (m, 1H, 2-H), 3.50 (dd, 1H, *J* 6.2 and 9.4, 1-H<sub>a</sub>), 3.33 (dd, 1H, *J* 7.9 and 9.4, 1-H<sub>b</sub>), 2.26-2.34 (m, 2H, 3-H) and 0.05 (s, 9H, (CH<sub>3</sub>)<sub>3</sub>Si);  $\delta_{\text{H}}$  (100 MHz, CDCl<sub>3</sub>) 142.0 (CH, C-4), 138.0 (C, C<sub>arom</sub>), 133.9 (CH, C-5), 128.4 (2 x CH, C<sub>arom</sub>), 127.7 (2 x CH, C<sub>arom</sub>), 126.5 (CH, C<sub>arom</sub>), 74.7, 73.3 (2 x CH<sub>2</sub>, C-1, CH<sub>2</sub>Ph), 69.6 (CH, C-2), 40.8 (CH<sub>2</sub>, C-3) and -1.68 (CH<sub>3</sub>, (CH<sub>3</sub>)<sub>3</sub>Si).

**(2*S*,6*S*)-(2-[(Benzyloxy)methyl]-6-(2-bromoethyl)-3,6-dihydro-2*H*-pyran) *cis*-10 and (2*S*,6*R*)-(2-[(Benzyloxy)methyl]-6-(2-bromoethyl)-3,6-dihydro-2*H*-pyran) *anti*-10**

To a solution of (*Z*)-olefin **14** (2.0 g, 7.6 mmol) and 2-(2-bromoethyl)-1,3-dioxolane **15** (906  $\mu$ L, 7.56 mmol) in dry dichloromethane (40 mL) was added  $\text{InCl}_3$  (1.7g, 7.6 mmol). After 48 hours at room temperature the mixture was diluted with dichloromethane (20 mL) and water was added (50 mL). The organic phase was extracted with brine (40 mL) then dried over  $\text{MgSO}_4$ . Flash chromatography of the residue obtained after removal of the solvent at reduced pressure using hexane-ethyl acetate (95:5) as eluent afforded the *title compound* **10** (1.71 g, 73%) of as a 77:23 mixture of *cis/trans* diastereomers as a colourless liquid.

**Spectroscopic data for *cis*-10:**

$[\alpha]_{589}^{20}$  -31 ( $c = 0.22$ ,  $\text{CHCl}_3$ );  $\nu_{\text{max}}$  (film)/ $\text{cm}^{-1}$  3030, 2925, 2855, 1495, 1455, 1365, 1345, 1255, 1205, 1190, 1130, 1090, 1030, 950, 909, 735, 700;  $\delta_{\text{H}}$  (400 MHz;  $\text{CDCl}_3$ ) 7.36-7.27 (m, 5H, ArH), 5.86 (m, 1H, 5-H), 5.63 (tdd, 1H,  $J$  1.4, 2.7 and 10.2, 4-H), 4.66 (d, 1H,  $J$  12.2,  $\text{CH}_2\text{Ph}$ ), 4.61 (d, 1H,  $J$  12.2,  $\text{CH}_2\text{Ph}$ ), 4.34 (brm, 1H, 6-H), 3.84 (tdd, 1H,  $J$  3.9, 5.9 and 10.1, 2-H), 3.61-3.46 (m, 4H, 1'-H, 2''-H) and 2.13-1.91 (m, 4H, 1''-H, 3-H);  $\delta_{\text{C}}$  (100 MHz;  $\text{CDCl}_3$ ) 138.3 (C,  $\text{C}_{\text{arom}}$ ), 129.1 (CH, C-4), 128.3 (2 x CH,  $\text{C}_{\text{arom}}$ ), 127.6 (2 x CH,  $\text{C}_{\text{arom}}$ ), 127.5 (CH,  $\text{C}_{\text{arom}}$ ), 125.2 (CH, C-5), 73.4 ( $\text{CH}_2$ ,  $\text{CH}_2\text{Ph}$ ), 73.3 (CH, C-2), 73.0 ( $\text{CH}_2$ , C-1'), 72.7 (CH, C-6), 38.7 ( $\text{CH}_2$ , C-1''), 29.6 ( $\text{CH}_2$ , C-2'') and 27.6 ( $\text{CH}_2$ , C-3); MS (EI)  $m/z$  (%) 312 (3,  $[\text{M}(\text{C}_{15}\text{H}_{19}^{81}\text{BrO}_2)^+]$ ), 310 (3,  $[\text{M}(\text{C}_{15}\text{H}_{19}^{79}\text{BrO}_2)^+]$ ), 221 (11), 219 (11), 137 (5), 135 (5), 91 (100), 81 (33,  $[\text{Br}^+]$ ), 79 (11,  $[\text{Br}^+]$ ); HRMS (CI)  $m/z$  310.0564 (calcd for  $\text{C}_{15}\text{H}_{19}^{79}\text{BrO}_2$  310.0568), 312.0539 (calcd for  $\text{C}_{15}\text{H}_{19}^{81}\text{BrO}_2$  312.0548).

**Spectroscopic data for *trans*-10:**

$\delta_{\text{H}}$  (400 MHz;  $\text{CDCl}_3$ ) 7.27-7.38 (m, 5H, ArH), 5.87 (m, 1H, 5-H), 5.69 (bd, 1H,  $J$  10.6, 4-H), 4.62 (d, 1H,  $J$  12.1,  $\text{CH}_2\text{Ph}$ ), 4.58 (d, 1H,  $J$  12.1,  $\text{CH}_2\text{Ph}$ ), 4.41 (brd, 1H,  $J$  9.8, 6-H), 3.87 (td, 1H,  $J$  4.3 and 13.3, 2-H), 3.45-3.64 (m, 4H, 1'-H, 2''-H) and 1.87-2.30 (m, 4H, 1''-H, 3-H);  $\delta_{\text{C}}$  (100 MHz;  $\text{CDCl}_3$ ) 138.3 (C,  $\text{C}_{\text{arom}}$ ), 128.6 (CH, C-4), 128.4 (2 x CH,  $\text{C}_{\text{arom}}$ ), 127.6 (3 x CH,  $\text{C}_{\text{arom}}$ ), 124.4 (CH, C-5), 73.5 ( $\text{CH}_2$ , C-1'), 72.6 ( $\text{CH}_2$ ,  $\text{CH}_2\text{Ph}$ ), 70.6 (CH, C-6), 67.2 (CH, C-2), 36.6 ( $\text{CH}_2$ , C-1''), 30.0 ( $\text{CH}_2$ , C-3) and 27.1 ( $\text{CH}_2$ , C-2'').

### 3-[(4-Methoxybenzyl)oxy]propanal **17**

To a solution of oxalyl chloride (1.4 mL, 16.2 mmol) in dichloromethane (15 mL) at  $-78\text{ }^{\circ}\text{C}$  was added dropwise a solution of dimethyl sulfoxide (1.9 mL, 27.0 mmol) in dichloromethane (6 mL). After 30 minutes, a solution of 3-[(4-methoxybenzyl)oxy]-1-propanol **16**<sup>ii</sup> (1 g, 6.0 mmol) in dichloromethane (1 mL) was added dropwise. After stirring for 1 hour at  $-78\text{ }^{\circ}\text{C}$ ,  $\text{Et}_3\text{N}$  (6.7 mL, 48.1 mmol) was added dropwise and the solution allowed to warm to room temperature. After 30 minutes, 1 M HCl (30 mL) was added and the aqueous phase extracted with dichloromethane (2 x 50 mL). The organic extracts were washed with sat.  $\text{NaHCO}_3$  and dried over  $\text{MgSO}_4$ . Flash chromatography of the residue obtained after removal of the solvent at reduced pressure using hexane-ethyl acetate (80:20) as eluent afforded the title aldehyde **17**<sup>iii</sup> (949 mg, 96%) as a colorless oil;  $\nu_{\text{max}}$  (film)/ $\text{cm}^{-1}$  2905, 2835, 1725, 1615, 1585, 1515, 1465, 1360, 1300, 1245, 1175, 1090, 1035, 820, 760;  $\delta_{\text{H}}$  (400 MHz;  $\text{CDCl}_3$ ) 9.78 (t, 1H,  $J$  1.9, 1-H), 7.25 (d, 2H,  $J$  8.5, ArH), 6.88 (d, 2H,  $J$  8.5, ArH), 4.46 (s, 2H,  $\text{CH}_2\text{Ar}$ ), 3.80 (s, 3H,  $\text{CH}_3\text{OAr}$ ), 3.78 (t, 2H,  $J$  6.2, 3-H) and 2.67 (dt, 2H,  $J$  1.9 and 6.2, 2-H);  $\delta_{\text{C}}$  (100 MHz;  $\text{CDCl}_3$ ) 201.2 (C, C-1), 159.2 (C,  $\text{C}_{\text{arom}}$ ), 129.9 (C,  $\text{C}_{\text{arom}}$ ), 129.3 (2 x CH,  $\text{C}_{\text{arom}}$ ), 113.8 (2 x CH,  $\text{C}_{\text{arom}}$ ), 72.9 ( $\text{CH}_2$ ,  $\text{CH}_2\text{Ar}$ ), 63.5 ( $\text{CH}_2$ , C-3), 55.2 ( $\text{CH}_3$ ,  $\text{CH}_3\text{OAr}$ ) and 43.8 ( $\text{CH}_2$ , C-2); MS (EI)  $m/z$  (%) 194 (16,  $[\text{M}]^+$ ), 137 (78,  $[\text{OPMBn}]^+$ ), 121 (100,  $[\text{PMBn}]^+$ ), 109 (17) and 77 (16); HRMS (EI)  $m/z$  194.0939 (calcd for  $\text{C}_{11}\text{H}_{14}\text{O}_3$  194.0943).

### (+)-(3*R*,4*R*)-1-[(4-Methoxybenzyl)oxy]-4-methylhex-5-en-3-ol **18**

(*Z*)-butene (5 mL) was condensed and transferred to a mixture of  $t\text{BuOK}$  (1.4 g, 11.3 mmol) in dry THF (24 mL).  $\text{BuLi}$  (7.1 mL, 11.3 mmol) was added dropwise and the yellow solution allowed to warm to  $-45\text{ }^{\circ}\text{C}$  for 15 minutes. After cooling to  $-78\text{ }^{\circ}\text{C}$ , a solution of (-)- $\text{B}(\text{Ipc})_2\text{B}(\text{OMe})$  (3.90 g, 12.4 mmol) in THF (22 mL) was added dropwise to afford a colourless solution. After 45 minutes,  $\text{BF}_3\cdot\text{OEt}_2$  (1.8 mL, 13.2 mmol) was added, followed immediately by a solution of 3-[(4-methoxybenzyl)oxy]propanal **17** (2.0 g, 10.3 mmol) in THF (28 mL). After 2 hours at  $-78\text{ }^{\circ}\text{C}$ , a solution of 1 M  $\text{NaOH}$  (12 mL) in water (2 mL) was added and the mixture heated under reflux for 1 hour. The aqueous phase was extracted with  $\text{EtOAc}$  (3 x 80 mL) and the organic extracts were dried over  $\text{MgSO}_4$ . Flash chromatography of the residue obtained after removal of the solvent at reduced pressure using hexane-ethyl acetate (80:20) as eluent afforded the *title product* (1.90 g, 72%) as a single diastereomer and as a colourless liquid;  $[\alpha]_{589}^{20} + 7.5$  ( $c = 0.12$ ,  $\text{CHCl}_3$ );  $\nu_{\text{max}}$  (film)/ $\text{cm}^{-1}$  3450, 2960, 2870, 1615, 1515, 1465, 1365,

1305, 1250, 1175, 1090, 1085, 1000, 915, 820, 735;  $\delta_{\text{H}}$  (400 MHz;  $\text{CDCl}_3$ ) 7.26 (d, 2H,  $J$  8.6, ArH), 6.88 (d, 2H,  $J$  8.6, ArH), 5.79 (ddd, 1H,  $J$  7.6, 10.4 and 17.3, 5-H), 5.03-5.08 (m, 2H, 6-H), 4.46 (s, 2H,  $\text{CH}_2\text{Ar}$ ), 3.81 (s, 3H,  $\text{CH}_3\text{OAr}$ ), 3.59-3.73 (m, 3H, 1-H, 3-H), 2.90 (d, 1H,  $J$  3.2, OH), 2.18-2.34 (m, 1H, 4-H), 1.64-1.82 (m, 2H, 2-H) and 1.06 (d, 3H,  $J$  6.9,  $\text{CH}_3$ );  $\delta_{\text{C}}$  (100 MHz;  $\text{CDCl}_3$ ) 152.7 (C,  $\text{C}_{\text{arom}}$ ), 141.0 (CH, C-5), 130.0 (CH,  $\text{C}_{\text{arom}}$ ), 129.3 (2 x CH,  $\text{C}_{\text{arom}}$ ), 114.9 (CH, C-6), 113.8 (2 x CH,  $\text{C}_{\text{arom}}$ ), 74.6 (CH, C-3), 73.0 ( $\text{CH}_2$ ,  $\text{CH}_2\text{Ar}$ ), 69.2 ( $\text{CH}_2$ , C-1), 55.3 ( $\text{CH}_3$ ,  $\text{CH}_3\text{OAr}$ ), 43.8 (CH, C-4), 33.5 ( $\text{CH}_2$ , C-2) and 15.0 ( $\text{CH}_3$ ,  $\text{CH}_3$ ); MS (EI)  $m/z$  (%) 250 (1,  $[\text{M}]^+$ ), 232 (0.5,  $[\text{M}-\text{H}_2\text{O}]^+$ ), 194 (2), 137 (22,  $[\text{OPMBn}]^+$ ) and 121 (100); HRMS (EI)  $m/z$  250.1567 (calcd for  $\text{C}_{15}\text{H}_{22}\text{O}_3$  250.1569).

Conversion to a Mosher ester derivative established the enantiomeric excess to be 97%.

### **(+)-(3*R*,4*R*)-1-[(4-Methoxybenzyl)oxy]-4-methyl-3-(*tert*-butyldiphenylsilyloxy)-5-hexene 19**

To a solution of alcohol **18** (1.8 g, 7.2 mmol) and imidazole (2.2 g, 31.7 mmol) in DMF (15 mL) was added dropwise *tert*-butyldiphenylsilyl chloride (5.6 mL, 21.6 mmol). The mixture was stirred overnight at 100 °C then the DMF was evaporated under reduced pressure. The residue was taken up in  $\text{Et}_2\text{O}$  (200 mL), washed with brine (3 x 40 mL) and the organic layer dried over  $\text{MgSO}_4$ . Flash chromatography using hexane-ethyl acetate (100:0  $\rightarrow$  95:5  $\rightarrow$  9:1) as eluent afforded the *title product* (3.48 g, 99%) as a colourless oil;

$[\alpha]_{589}^{20} + 11$  ( $c = 0.21$ ,  $\text{CHCl}_3$ );  $\nu_{\text{max}}$  (film)/ $\text{cm}^{-1}$  2965, 1790, 1750, 1610, 1515, 1465, 1305, 1265, 1250, 1175, 1100, 1060, 1035, 930, 820;  $\delta_{\text{H}}$  (400 MHz;  $\text{CDCl}_3$ ) 7.67-7.69 (m, 4H, PhSi), 7.32-7.45 (m, 6H, PhSi), 7.11 (d, 2H,  $J$  8.7, ArH), 6.84 (d, 2H,  $J$  8.7, ArH), 5.98 (ddd, 1H,  $J$  6.4, 10.6 and 17.2, 5-H), 5.01 (td,  $J$  1.7, 1.7 and 10.6, 6- $\text{H}_a$ ), 4.97 (td,  $J$  1.7, 1.7 and 17.2, 6- $\text{H}_b$ ), 4.18 (s, 2H,  $\text{CH}_2\text{Ph}$ ), 3.81 (m, 3H,  $\text{CH}_3\text{OAr}$ ), 3.79-3.85 (m, 1H, 3-H), 3.37 (td, 1H,  $J$  7.0,  $J$  9.2, 1- $\text{H}_a$ ), 3.25 (td, 1H,  $J$  7.0 and 9.2, 1- $\text{H}_b$ ), 2.28-2.38 (m, 1H, 4-H), 1.71 (q, 2H,  $J$  7.0, 2-H), 1.06 (s, 9H,  $(\text{CH}_3)_3\text{CSi}$ ) and 0.90 (d, 3H,  $J$  7.0,  $\text{CH}_3$ );  $\delta_{\text{C}}$  (100 MHz;  $\text{CDCl}_3$ ) 159.0 (C,  $\text{C}_{\text{arom}}$ ), 140.7 (CH, C-5), 136.0 (4 x CH,  $\text{C}_{\text{arom}}$ ), 134.5, 134.1 (2 x C,  $\text{C}_{\text{arom}}$ ), 130.7 (C,  $\text{C}_{\text{arom}}$ ), 129.5 (2 x CH,  $\text{C}_{\text{arom}}$ ), 129.4 (2 x CH,  $\text{C}_{\text{arom}}$ ), 127.4 (4 x CH,  $\text{C}_{\text{arom}}$ ), 114.2 ( $\text{CH}_2$ , C-6), 113.6 (2 x CH,  $\text{C}_{\text{arom}}$ ), 74.6 (CH, C-3), 72.3 ( $\text{CH}_2$ ,  $\text{CH}_2\text{Ph}$ ), 67.0 ( $\text{CH}_2$ , C-1), 55.2 ( $\text{CH}_3$ ,  $\text{CH}_3\text{OAr}$ ), 42.4 (CH, C-4), 33.5 ( $\text{CH}_2$ , C-2), 27.1 ( $\text{CH}_3$ ,  $(\text{CH}_3)_3\text{CSi}$ ), 19.6 (C,  $(\text{CH}_3)_3\text{CSi}$ ) and 14.5 ( $\text{CH}_3$ ,  $\text{CH}_3$ ); MS (CI)  $m/z$  (%) 489 (1,  $[\text{M} + \text{H}]^+$ ), 433 (2,  $[\text{M}-t\text{Bu}]^+$ ), 352 (2), 336 (2), 216 (5), 199 (5), 137 (14,  $[\text{OPMBn}]^+$ ) and 121 (100); HRMS (CI)  $m/z$  489.2825 (calcd for  $\text{C}_{31}\text{H}_{41}\text{O}_3\text{Si}$  489.2825).

**(-)-(3R,4R)-4-[tert-Butyl(diphenyl)silyl]oxy-6-[(4-methoxybenzyl)oxy]-3-methyl-1-hexanol 20**

To a solution of alkene **19** (3.3 g, 6.8 mmol) in dry THF (100 mL) was added BH<sub>3</sub>·DMS (1.3 mL, 13.5 mmol) dropwise. After stirring for 6 hours at room temperature MeOH was slowly added followed by 1 M NaOH (30 mL) and 30% hydrogen peroxide (2.7 mL, 23.6 mmol). The solution was left to stir for 3 hours at room temperature the water (30 mL) was added, the separated and the aqueous layer extracted with Et<sub>2</sub>O (2 x 100 mL). The combined organic extracts were washed with brine (100 mL) and dried over MgSO<sub>4</sub>. Flash chromatography (SiO<sub>2</sub>, using hexane-diethyl ether 70:30) afforded the *title compound* (2.7 g, 78%) as a colourless oil.

$[\alpha]_{589}^{20}$  -7 (c = 0.43, CHCl<sub>3</sub>)  $\nu_{\max}$  (film)/cm<sup>-1</sup> 3400, 2930, 2860, 1610, 1590, 1515, 1460, 1430, 1360, 1300, 1250, 1175, 1110, 1040, 1005, 820, 740, 705, 610;  $\delta_{\text{H}}$  (400 MHz; CDCl<sub>3</sub>) 7.34-7.69 (m, 10H, PhSi), 7.10 (d, 2H, *J* 8.7, ArH), 6.84 (d, 2H, *J* 8.7, ArH), 4.19 (d, 1H, *J* 11.6, CH<sub>2</sub>Ar); 4.16 (d, 1H, *J* 11.6, CH<sub>2</sub>Ar), 3.82 (ddd, 1H, *J* 2.8, 5.2 and 8.3, 4-H), 3.80 (s, 3H, CH<sub>3</sub>OPh), 3.57 (td, 1H, *J* 6.1 and 9.8, 1-H<sub>a</sub>), 3.46 (td, 1H, *J* 6.6 and 9.8, 1-H<sub>b</sub>), 3.35 (ddd, 1H, *J* 5.9, 7.2 and 9.1, 6-H<sub>a</sub>), 3.22 (td, 1H, *J* 7.0 and 9.1, 6-H<sub>b</sub>), 1.66-1.83 (m, 4H, 2-H, 3-H, 5-H), 1.38-1.44 (m, 1H, 2-H), 1.06 (s, 9H, (CH<sub>3</sub>)<sub>3</sub>CSi) and 0.82 (d, 3H, *J* 6.8, CH<sub>3</sub>);  $\delta_{\text{C}}$  (100 MHz; CDCl<sub>3</sub>) 159.0 (C, C<sub>arom</sub>), 136.0 (4 x CH, PhSi), 134.4 (C, PhSi), 134.0 (C, PhSi), 130.5 (C, C<sub>arom</sub>), 129.7 (2 x CH, C<sub>arom</sub>), 129.5 (2 x CH, PhSi), 129.1 (2 x CH, C<sub>arom</sub>), 127.5 (4 x CH, PhSi), 113.6 (2 x CH, C<sub>arom</sub>), 74.4 (CH, C-4), 72.3 (CH<sub>2</sub>, CH<sub>2</sub>Ph), 67.3 (CH<sub>2</sub>, C-6), 61.5 (CH<sub>2</sub>, C-1), 55.3 (CH<sub>3</sub>, CH<sub>3</sub>OPh), 35.2 (CH, C-3), 35.1 (CH<sub>2</sub>, C-2), 33.0 (CH<sub>2</sub>, C-5), 27.1 (3 x CH<sub>3</sub>, (CH<sub>3</sub>)<sub>3</sub>CSi), 19.5 (C, (CH<sub>3</sub>)<sub>3</sub>CSi) and 15.3 (CH<sub>3</sub>, CH<sub>3</sub>); MS (CI) *m/z* (%) 507 (1, [M + H]<sup>+</sup>), 433 (1), 255 (2), 199 (11), 137 (4, [OPMBn]<sup>+</sup>) and 121 (100); HRMS (CI) *m/z* 507.2921 (calcd for C<sub>31</sub>H<sub>43</sub>O<sub>4</sub>Si 507.2931).

**(+)-(3R,4R)-4-[tert-Butyl(diphenyl)silyl]oxy-6-[(4-methoxybenzyl)oxy]-3-methylhexanal 11**

To a solution of alcohol **20** (1.2 g, 2.36 mmol) in dichloromethane (30 mL) is added pyridine (572 mL, 7.08 mmol) followed by Dess-Martin periodinane (2.01 g, 4.73 mmol). After stirring for 2 hours at room temperature the mixture was diluted with dichloromethane (50 mL) and sat. Na<sub>2</sub>S<sub>2</sub>O<sub>3</sub> (50 mL) was added. The organic layer was washed with brine (100 mL) and dried over MgSO<sub>4</sub>. Flash chromatography of the residue obtained after removal of the solvent at reduced pressure using hexane-diethyl ether (90:10) as eluent afforded the *title compound* (1.60 g, 84%) as a colourless oil;  $[\alpha]_{589}^{20}$  +10 (c = 0.23, CHCl<sub>3</sub>);  $\nu_{\max}$  (film)/cm<sup>-1</sup> 2930, 2860, 1725, 1615, 1515,

1460, 1430, 1360, 1300, 1250, 1175, 1110, 1040, 935, 820, 740, 705, 615;  $\delta_{\text{H}}$  (400 MHz;  $\text{CDCl}_3$ ) 9.51 (t, 1H,  $J$  1.7, 1-H), 7.65-7.67 (m, 4H, PhSi), 7.34-7.45 (m, 6H, PhSi), 7.11 (d, 2H,  $J$  8.5, ArH), 6.84 (d, 2H,  $J$  8.5, ArH), 4.21 (d, 1H,  $J$  11.9,  $\text{CH}_2\text{Ar}$ ), 4.18 (d, 1H,  $J$  11.9,  $\text{CH}_2\text{Ar}$ ), 3.86 (ddd, 1H,  $J$  2.5, 5.0 and 7.3, 4-H), 3.81 (s, 3H,  $\text{CH}_3\text{OPh}$ ), 3.36 (ddd, 1H,  $J$  5.9, 7.0 and 9.1, 6- $\text{H}_a$ ), 3.26 (td, 1H,  $J$  7.0 and 9.1, 6- $\text{H}_b$ ), 2.62 (m, 1H, 2- $\text{H}_a$ ), 2.15-2.24 (m, 2H, 2- $\text{H}_b$ , 3-H), 1.63-1.79 (m, 2H, 5-H), 1.06 (s, 9H,  $(\text{CH}_3)_3\text{CSi}$ ) and 0.84 (d, 3H,  $J$  6.4,  $\text{CH}_3$ );  $\delta_{\text{C}}$  (100 MHz;  $\text{CDCl}_3$ ) 202.6 (CH, C-1), 159.1 (C,  $\text{C}_{\text{arom}}$ ), 135.9 (4 x CH, PhSi), 134.2 (C, PhSi), 133.8 (C, PhSi), 130.5 (C,  $\text{C}_{\text{arom}}$ ), 129.8 (2 x CH, PhSi), 129.6 (CH,  $\text{C}_{\text{arom}}$ ), 129.1 (2 x CH,  $\text{C}_{\text{arom}}$ ), 127.6 (CH, PhSi), 127.5 (4 x CH, PhSi), 113.7 (2 x CH,  $\text{C}_{\text{arom}}$ ), 73.8 (CH, C-4), 72.4 ( $\text{CH}_2$ ,  $\text{CH}_2\text{Ar}$ ), 67.0 ( $\text{CH}_2$ , C-6), 55.2 ( $\text{CH}_3$ ,  $\text{CH}_3\text{OAr}$ ), 46.5 ( $\text{CH}_2$ , C-2), 33.0 ( $\text{CH}_2$  and CH, C-5 and C-3), 27.1 (3 x  $\text{CH}_3$ ,  $(\text{CH}_3)_3\text{CSi}$ ), 19.5 (C,  $(\text{CH}_3)_3\text{CSi}$ ) and 14.9 ( $\text{CH}_3$ ,  $\text{CH}_3$ ); MS (CI)  $m/z$  (%) 522 (2,  $[\text{M} + \text{NH}_4]^+$ ), 367 (12), 216 (3), 196 (4), 137 (9), 121 (100), 111 (8); HRMS (CI)  $m/z$  522.3037 ( $\text{M} + \text{NH}_4^+$ ) (calcd for  $\text{C}_{31}\text{H}_{40}\text{O}_4\text{SiNH}_4$  522.3034).

## References

- 
- i M.-T. Lai, E. Oh, Y. Shih and H.-W. Liu, *J. Org. Chem.*, 1992, **57**, 2471.
  - ii F. Coelho and G. Diaz, *Tetrahedron*, 2002, **58**, 1647.
  - iii F. Matsuda, M. Kito, T. Sakai and N. Okada, *Tetrahedron*, 1999, **55**, 14369.
